# Supplementary material for: Solvent free base catalysis and transesterification over basic functionalised Metal-Organic Frameworks
Source: Royal Society of Chemistry journal article supplement (doi:10.1039/b915291c), 2009-01-01
Supplement: b915291c.pdf [file b915291c.pdf]

## SUPPORTING INFORMATION

# Solvent free base Catalysis and Transesterification over basic functionalised Metal-Organic Frameworks

M. Savonnet, S. Aguado, U.Ravon, D. Bazer-Bachi, V. Lecocq, N. Bats, C. Pinel, D. Farrusseng\*

*IRCELYON, Institut de recherches sur la catalyse et l'environnement de Lyon, 2 avenue Albert Einstein, F-69626 Villeurbanne*

|                                                                                                                          |    |
|--------------------------------------------------------------------------------------------------------------------------|----|
| Figure 1 : Powder X-Ray diffraction patterns of IRMOF-3 <b>1a</b>                                                        | S2 |
| Figure 2: N <sub>2</sub> isotherm at 77K of IRMOF-3 <b>1a</b>                                                            | S2 |
| Figure 3 : FT-IR spectrum of IRMOF-3 <b>1a</b> and modified IRMOF-3 <b>1b</b>                                            | S3 |
| Figure 4 : Synthesis and <sup>1</sup> H-NMR results of the functionalised ligand                                         | S3 |
| Figure 5 : <sup>1</sup> H-NMR results of digested modified IRMOF-3 <b>1b</b>                                             | S4 |
| Figure 6 : Negative ion mode ESI-MS spectra of digested modified IRMOF-3 <b>1b</b>                                       | S4 |
| Figure 7 : Powder X-Ray diffraction patterns of as-synthesized <b>2a</b> and modified ZnF(Am <sub>2</sub> TAZ) <b>2b</b> | S5 |

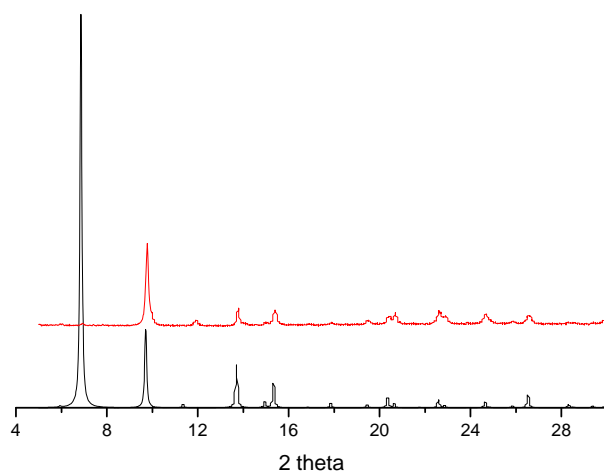

Figure 1. Powder X-Ray diffraction patterns of IRMOF-3 **1a**. Experimental result (top), simulated pattern from IRMOF-3.cif file (bottom).

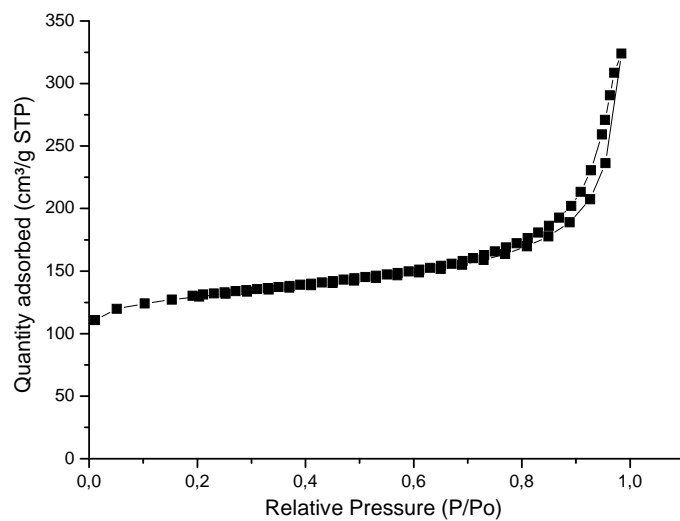

Figure 2. N<sub>2</sub> isotherm at 77K of IRMOF-3 **1a**

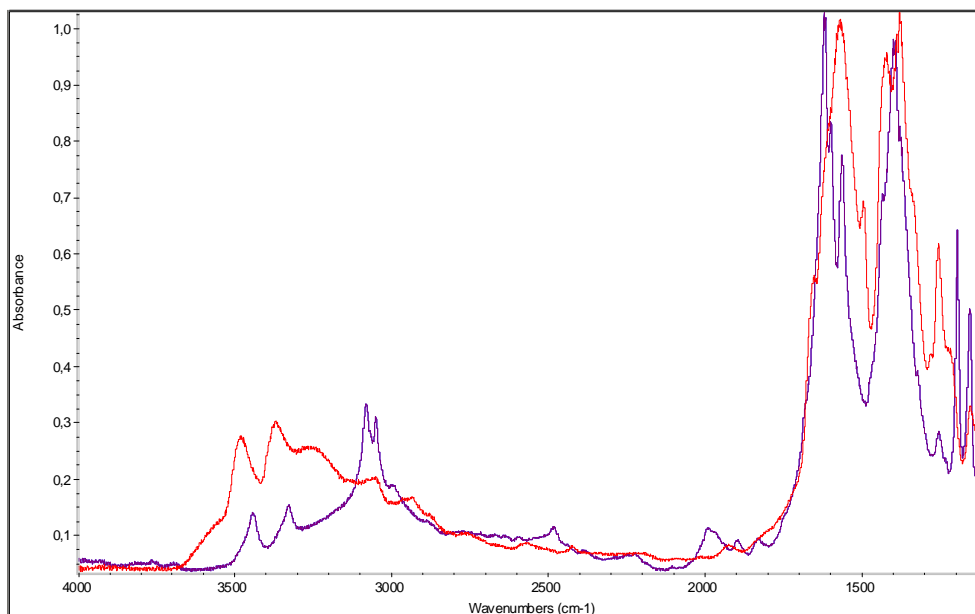

Figure 3. FT-IR spectrum of as-synthesized (red) **1a** and modified IRMOF-3 **1b** (blue).

The functionalised ligand was obtained by acylation of dimethylaminoterephthalate (1.5 g) with nicotinoyl chloride (3 g) in a dichloromethane solution containing triethylamine (9 mL) and DMAP (0.7 g) at room temperature for 5 h. The ligand is obtained after saponification, followed by acidification on Amberlite IR-120 resin.

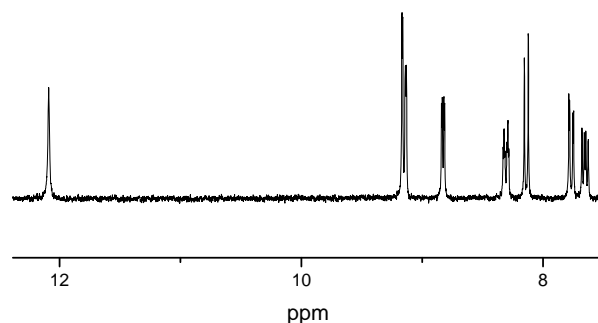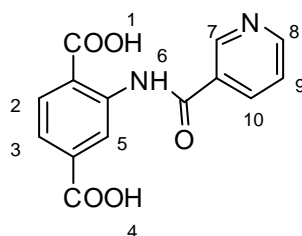

$^1\text{H RMN}$ : (DMSO,  $\text{D}_2\text{O}/\text{DCI}$ , 250 MHz):  $\delta$  (ppm) 13.44 (s, 2H,  $\text{H}_1$ ,  $\text{H}_4$ ), 12.09 (s, 1H,  $\text{H}_6$ ), 9.16 (d, 1H,  $^4J_{\text{HH}} = 1.58$  Hz,  $\text{H}_5$ ), 9.13 (d, 1H,  $^4J_{\text{HH}} = 1.9$  Hz,  $\text{H}_7$ ), 8.82 (dd,  $^4J_{\text{HH}} = 1.58$  Hz,  $^3J_{\text{HH}} = 4.9$  Hz,  $\text{H}_8$ ), 8.30 (ddd,  $^4J_{\text{HH}} = 1.9$  Hz,  $^4J_{\text{HH}} = 1.58$  Hz,  $^3J_{\text{HH}} = 8$  Hz,  $\text{H}_{10}$ ), 8.14 (d, 1H,  $^1J_{\text{HH}} = 8$  Hz,  $\text{H}_2$ ), 7.76 (dd, 1H,  $^3J_{\text{CH}} = 1.58$  Hz,  $^3J_{\text{CH}} = 8$  Hz,  $\text{H}_3$ ), 7.64 (dd, 1H,  $^3J_{\text{CH}} = 4.9$  Hz,  $^3J_{\text{CH}} = 8$  Hz,  $\text{H}_9$ )

Figure 4.  $^1\text{H}$ -NMR results of the functionalised ligand.

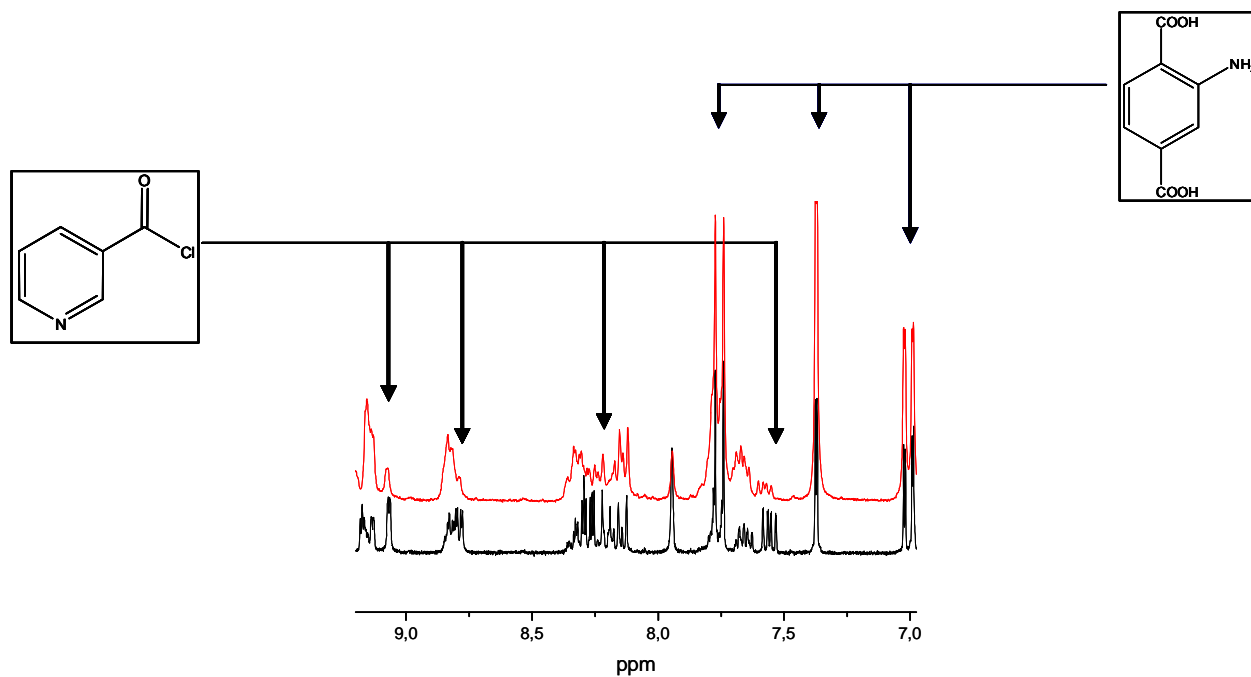

Figure 5.  $^1\text{H-NMR}$  results of digested modified IRMOF-3 **1b** without washing (black) and digested modified IRMOF-3 **1b** with repeated washings (red).

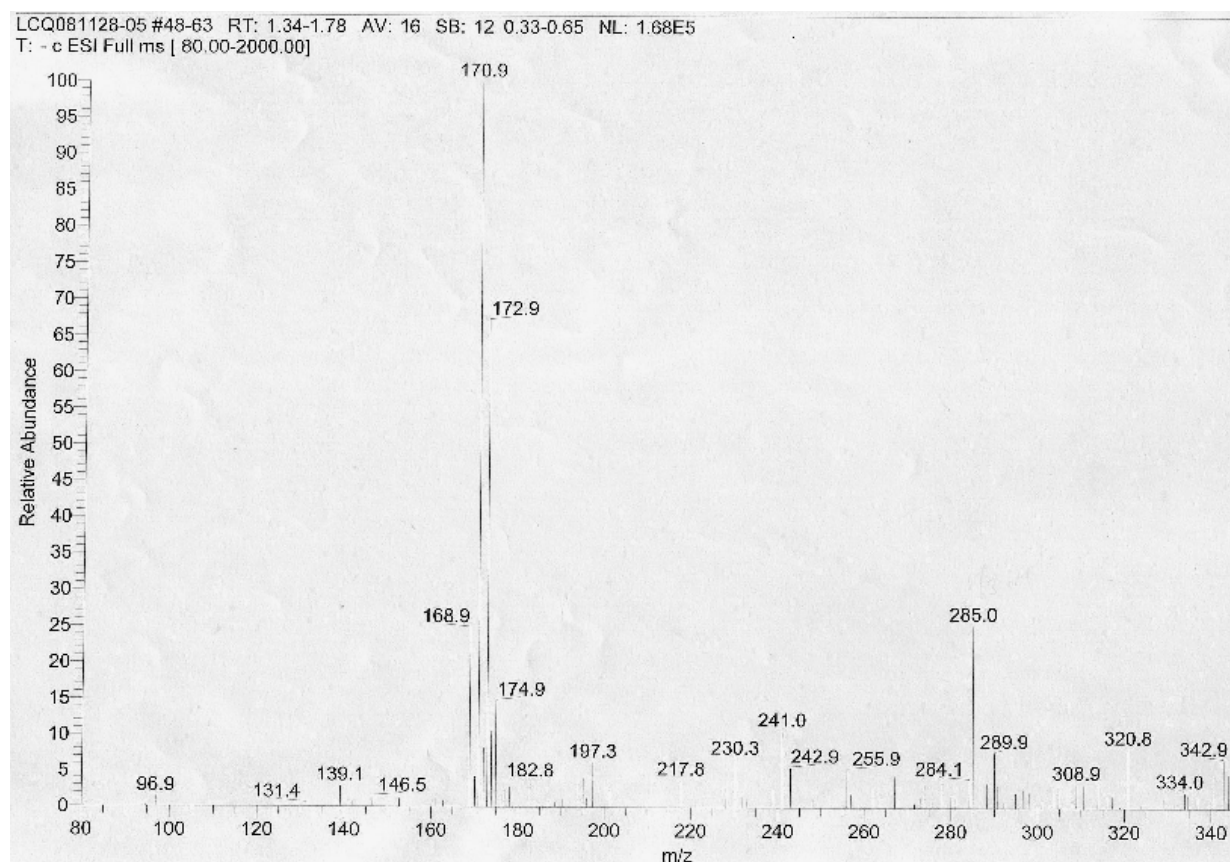

Figure 6. Negative ion mode ESI-MS of digested modified IRMOF-3 **1b**

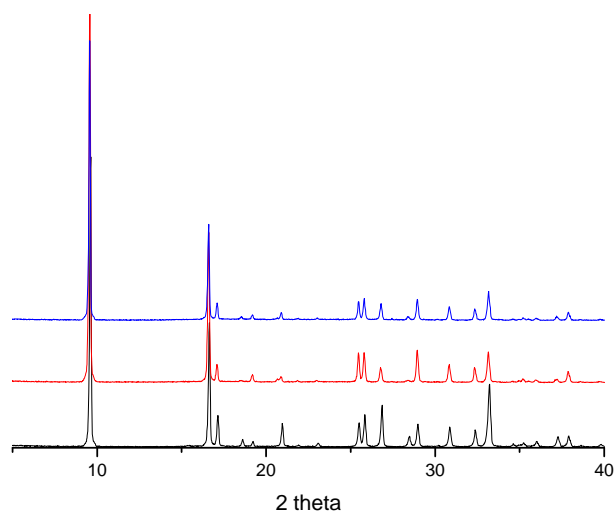

Figure 7. Powder X-Ray diffraction patterns of ZnF(Am<sub>2</sub>TAZ) 2a (black), post-functionalized ZnF(Am<sub>2</sub>TAZ) 2b (red) and post-functionalised ZnF(Am<sub>2</sub>TAZ) 2b after reaction.
